# Supplementary material for: Projecting the Impact of Nutrition Policy to Improve Child Stunting: A Case Study in Guatemala Using the Lives Saved Tool
Source: PubMed Central journal article supplement (PMC8691882; doi:10.9745/ghsp-d-20-00585), 2021-12-31
Supplement: GHSP-D-20-00585-Supplement.pdf [file GHSP-D-20-00585-Supplement.pdf]

## TABLE OF CONTENTS

|                                                     |           |
|-----------------------------------------------------|-----------|
| <b>INTERVENTIONS INCLUDED IN THE MODEL.....</b>     | <b>3</b>  |
| <b>MODEL INPUTS.....</b>                            | <b>4</b>  |
| <b>Demographics.....</b>                            | <b>4</b>  |
| <i>First year population single age</i> .....       | 4         |
| <i>Total fertility rate</i> .....                   | 6         |
| <i>Age-specific fertility rate</i> .....            | 7         |
| <i>Sex ratio at birth</i> .....                     | 8         |
| <i>Life expectancy</i> .....                        | 9         |
| <i>International migration</i> .....                | 10        |
| <b>Health, Mortality and Economic Status.....</b>   | <b>11</b> |
| <i>Baseline child health status</i> .....           | 11        |
| Meningococcal A vaccine recommended.....            | 11        |
| Nutrition Deficiencies.....                         | 11        |
| Status at birth (percent of total births).....      | 11        |
| Incidence (Number of cases per child per year)..... | 11        |
| <i>Nutrition status distributions</i> .....         | 13        |
| Stunting.....                                       | 13        |
| <i>Pathogens</i> .....                              | 14        |
| Diarrhea – distribution among all cases.....        | 14        |
| Diarrhea – distribution among severe cases.....     | 14        |
| Diarrhea – distribution among fatal cases.....      | 14        |
| Pneumonia – distribution among severe cases.....    | 14        |
| Pneumonia – distribution among fatal cases.....     | 14        |
| Meningitis – distribution among severe cases.....   | 15        |
| Meningitis – distribution among fatal cases.....    | 15        |
| <i>Baseline child mortality</i> .....               | 16        |
| Mortality rate.....                                 | 16        |
| Percent of child deaths by proximate cause.....     | 16        |
| <i>Household status</i> .....                       | 17        |
| Poverty/food security.....                          | 17        |
| <b>Intervention Coverages.....</b>                  | <b>18</b> |
| <i>Notes</i> .....                                  | 18        |
| <i>Pregnancy</i> .....                              | 19        |
| Nutritional.....                                    | 19        |
| <i>Breastfeeding</i> .....                          | 20        |
| Breastfeeding Prevalence.....                       | 20        |
| <i>Preventative</i> .....                           | 21        |
| Food and supplementation.....                       | 21        |
| WASH (water, sanitation and hygiene).....           | 21        |

|                                                     |           |
|-----------------------------------------------------|-----------|
| <i>Vaccines</i> .....                               | 22        |
| <i>Curative</i> .....                               | 23        |
| <i>Fertility Risks</i> .....                        | 24        |
| Maternal age .....                                  | 24        |
| Birth intervals .....                               | 24        |
| <b>MODEL OUTPUTS</b> .....                          | <b>25</b> |
| <b>Stunting Prevalence</b> .....                    | <b>25</b> |
| <b>Stunting Cases Averted</b> .....                 | <b>26</b> |
| <b>Stunting Cases Averted by Intervention</b> ..... | <b>27</b> |
| <i>Historical Trends</i> .....                      | 27        |
| <i>Great Crusade</i> .....                          | 28        |
| <i>Great Crusade (fertility)</i> .....              | 29        |
| <i>Aspirational</i> .....                           | 30        |

## INTERVENTIONS INCLUDED IN THE MODEL

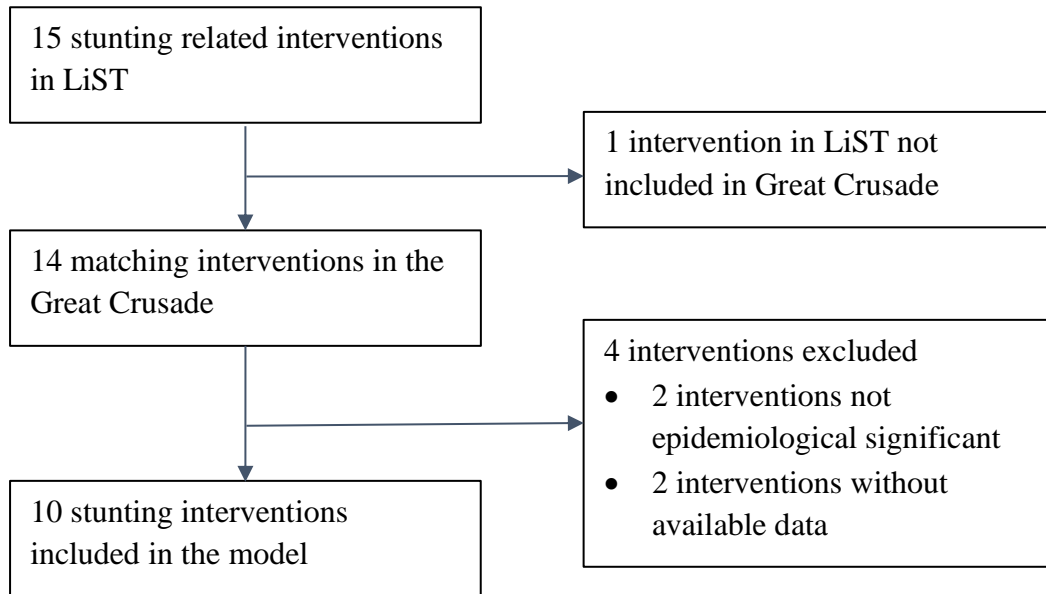

## MODEL INPUTS

### Demographics

*First year population single age*

| Age | Male    | Female  |  | Age | Male   | Female  |
|-----|---------|---------|--|-----|--------|---------|
| 0   | 193,140 | 184,360 |  | 41  | 87,311 | 97,985  |
| 1   | 193,084 | 184,827 |  | 42  | 83,725 | 95,009  |
| 2   | 193,486 | 185,541 |  | 43  | 80,193 | 92,056  |
| 3   | 192,847 | 184,749 |  | 44  | 76,729 | 89,056  |
| 4   | 191,977 | 183,962 |  | 45  | 73,357 | 85,974  |
| 5   | 191,156 | 183,246 |  | 46  | 70,112 | 82,802  |
| 6   | 190,401 | 182,608 |  | 47  | 66,987 | 79,328  |
| 7   | 188,802 | 181,171 |  | 48  | 63,960 | 75,996  |
| 8   | 186,540 | 179,120 |  | 49  | 61,013 | 72,636  |
| 9   | 185,852 | 178,580 |  | 50  | 58,159 | 69,338  |
| 10  | 183,284 | 176,249 |  | 51  | 55,397 | 66,175  |
| 11  | 182,564 | 175,701 |  | 52  | 52,767 | 63,202  |
| 12  | 181,812 | 175,138 |  | 53  | 50,260 | 60,413  |
| 13  | 181,017 | 174,554 |  | 54  | 47,895 | 57,801  |
| 14  | 180,174 | 173,973 |  | 55  | 45,699 | 55,357  |
| 15  | 179,270 | 173,387 |  | 56  | 43,737 | 53,440  |
| 16  | 178,264 | 172,757 |  | 57  | 41,949 | 51,298  |
| 17  | 177,084 | 172,004 |  | 58  | 40,261 | 49,220  |
| 18  | 182,554 | 177,758 |  | 59  | 38,640 | 47,185  |
| 19  | 185,290 | 180,995 |  | 60  | 37,047 | 45,184  |
| 20  | 183,174 | 179,629 |  | 61  | 35,475 | 43,235  |
| 21  | 175,274 | 172,717 |  | 62  | 33,937 | 41,329  |
| 22  | 170,249 | 168,605 |  | 63  | 32,441 | 39,478  |
| 23  | 165,229 | 164,481 |  | 64  | 30,997 | 37,685  |
| 24  | 162,470 | 162,513 |  | 65  | 29,603 | 35,944  |
| 25  | 159,398 | 160,214 |  | 66  | 28,280 | 34,255  |
| 26  | 155,974 | 157,453 |  | 67  | 27,022 | 32,624  |
| 27  | 152,121 | 154,213 |  | 68  | 25,821 | 31,032  |
| 28  | 147,939 | 150,618 |  | 69  | 24,654 | 29,469  |
| 29  | 143,401 | 146,664 |  | 70  | 23,426 | 27,881  |
| 30  | 138,517 | 142,395 |  | 71  | 22,346 | 26,413  |
| 31  | 133,356 | 137,920 |  | 72  | 21,259 | 24,963  |
| 32  | 128,035 | 133,330 |  | 73  | 20,142 | 23,507  |
| 33  | 122,667 | 128,704 |  | 74  | 18,985 | 22,028  |
| 34  | 117,383 | 124,132 |  | 75  | 17,793 | 20,531  |
| 35  | 112,281 | 119,709 |  | 76  | 16,569 | 19,046  |
| 36  | 107,450 | 115,479 |  | 77  | 15,346 | 17,601  |
| 37  | 102,928 | 111,485 |  | 78  | 14,133 | 16,212  |
| 38  | 98,734  | 107,772 |  | 79  | 12,943 | 14,884  |
| 39  | 94,718  | 104,258 |  | 80+ | 90,535 | 108,890 |

|           |        |         |  |              |           |           |
|-----------|--------|---------|--|--------------|-----------|-----------|
| <b>40</b> | 90,962 | 101,046 |  | <b>Total</b> | 8,297,763 | 8,560,479 |
|-----------|--------|---------|--|--------------|-----------|-----------|

Source: Estimaciones y *Proyecciones Nacionales de Población Metodología y Principales Resultados*. Guatemala City; 2019. (2019 Guatemalan Census)

Supplement to: Tschida S, Cordon A, Asturias G, et al. Projecting the impact of nutrition policy to improve child stunting: a case study in Guatemala using the Lives Saved Tool. *Glob Health Sci Pract.* 2021;9(4).

<https://doi.org/10.9745/GHSP-D-20-00585>

*Total fertility rate*

|            | <b>2020</b> | <b>2021</b> | <b>2022</b> | <b>2023</b> | <b>2024</b> | <b>2025</b> | <b>2026</b> | <b>2027</b> | <b>2028</b> | <b>2029</b> | <b>2030</b> |
|------------|-------------|-------------|-------------|-------------|-------------|-------------|-------------|-------------|-------------|-------------|-------------|
| <b>TFR</b> | 2.6         | 2.5         | 2.4         | 2.4         | 2.3         | 2.3         | 2.2         | 2.2         | 2.2         | 2.1         | 2.1         |

Source: 2019 Guatemalan census

Supplement to: Tschida S, Cordon A, Asturias G, et al. Projecting the impact of nutrition policy to improve child stunting: a case study in Guatemala using the Lives Saved Tool. *Glob Health Sci Pract.* 2021;9(4).

<https://doi.org/10.9745/GHSP-D-20-00585>

*Age-specific fertility rate*

| Age          | 2020       | 2021  | 2022  | 2023  | 2024  | 2025  | 2026  | 2027  | 2028  | 2029   | 2030       |
|--------------|------------|-------|-------|-------|-------|-------|-------|-------|-------|--------|------------|
| <b>15-19</b> | 12.17      | 12.12 | 12.08 | 12.02 | 11.90 | 11.90 | 11.83 | 11.76 | 11.68 | 11.60  | 11.51      |
| <b>20-24</b> | 24.27      | 24.24 | 24.21 | 24.18 | 24.10 | 24.10 | 24.06 | 24.01 | 23.96 | 23.90  | 23.85      |
| <b>25-29</b> | 23.55      | 23.58 | 23.61 | 23.64 | 23.73 | 23.73 | 23.77 | 23.82 | 23.87 | 23.93  | 23.99      |
| <b>30-34</b> | 19.38      | 19.42 | 19.46 | 19.52 | 19.64 | 19.64 | 19.71 | 19.78 | 19.87 | 19.96  | 20.05      |
| <b>35-39</b> | 13.08      | 13.09 | 13.10 | 13.12 | 13.16 | 13.16 | 13.18 | 13.21 | 13.23 | 13.26  | 13.28      |
| <b>40-44</b> | 6.10       | 6.09  | 6.08  | 6.07  | 6.05  | 6.05  | 6.03  | 6.02  | 6.00  | 5.99   | 5.97       |
| <b>45-49</b> | 1.47       | 1.46  | 1.45  | 1.44  | 1.42  | 1.42  | 1.41  | 1.40  | 1.38  | 1.37   | 1.36       |
| <b>Total</b> | 100.0<br>2 | 100   | 99.99 | 99.99 | 100   | 100   | 99.99 | 100   | 99.99 | 100.01 | 100.0<br>1 |

Source: Default data, World Population Prospects - Population Division - United Nations.

<https://population.un.org/wpp/>

Supplement to: Tschida S, Cordon A, Asturias G, et al. Projecting the impact of nutrition policy to improve child stunting: a case study in Guatemala using the Lives Saved Tool. *Glob Health Sci Pract.* 2021;9(4).

<https://doi.org/10.9745/GHSP-D-20-00585>

*Sex ratio at birth*

|                    | 2020  | 2021  | 2022  | 2023  | 2024  | 2025  | 2026  | 2027  | 2028  | 2029  | 2030  |
|--------------------|-------|-------|-------|-------|-------|-------|-------|-------|-------|-------|-------|
| <b>Birth ratio</b> | 103.7 | 103.7 | 103.7 | 103.7 | 103.7 | 103.7 | 103.7 | 103.7 | 103.7 | 103.7 | 103.7 |

Source: Calculated by authors using microdata from: International Ministerio de Salud Pública y Asistencia Social (MSPAS), Instituto Nacional de Estadística (INE), ICF International. *Encuesta Nacional de Salud Materno Infantil 2014-2015. Informe Final;* 2017. (ENSMI)



Supplement to: Tschida S, Cordon A, Asturias G, et al. Projecting the impact of nutrition policy to improve child stunting: a case study in Guatemala using the Lives Saved Tool. *Glob Health Sci Pract.* 2021;9(4).

<https://doi.org/10.9745/GHSP-D-20-00585>

*Life expectancy*

|               | <b>2020</b> | <b>2021</b> | <b>2022</b> | <b>2023</b> | <b>2024</b> | <b>2025</b> | <b>2026</b> | <b>2027</b> | <b>2028</b> | <b>2029</b> | <b>2030</b> |
|---------------|-------------|-------------|-------------|-------------|-------------|-------------|-------------|-------------|-------------|-------------|-------------|
| <b>Male</b>   | 69.9        | 70.1        | 70.3        | 70.5        | 70.7        | 70.8        | 71          | 71.2        | 71.4        | 71.6        | 71.8        |
| <b>Female</b> | 76.4        | 76.6        | 76.8        | 77          | 77.1        | 77.3        | 77.5        | 77.7        | 77.9        | 78          | 78.2        |

Source: 2019 Guatemalan census

Supplement to: Tschida S, Cordon A, Asturias G, et al. Projecting the impact of nutrition policy to improve child stunting: a case study in Guatemala using the Lives Saved Tool. *Glob Health Sci Pract.* 2021;9(4).

<https://doi.org/10.9745/GHSP-D-20-00585>

*International migration*

|               | <b>2020</b> | <b>2021</b> | <b>2022</b> | <b>2023</b> | <b>2024</b> |
|---------------|-------------|-------------|-------------|-------------|-------------|
| <b>Male</b>   | -21,098.20  | -19,643.90  | -18,346.30  | -17,116.30  | -16,030.90  |
| <b>Female</b> | -17,876.60  | -17,380.20  | -16,827.10  | -16,296.50  | -15,711.40  |

|               | <b>2025</b> | <b>2026</b> | <b>2027</b> | <b>2028</b> | <b>2029</b> |
|---------------|-------------|-------------|-------------|-------------|-------------|
| <b>Male</b>   | -15,153.70  | -14,323.70  | -13,608.60  | -12,928.60  | -12283.6    |
| <b>Female</b> | -14,998.10  | -14,317.80  | -13,602.60  | -12,922.40  | -12277.2    |

|               | <b>2030</b> |
|---------------|-------------|
| <b>Male</b>   | -11668.6    |
| <b>Female</b> | -11662.1    |

Source 2019 Guatemalan census

## Health, Mortality and Economic Status

### Baseline child health status

Meningococcal A vaccine recommended

Yes       No

Nutrition Deficiencies

| Input                       | Value | Source                                                                                                                                                 |
|-----------------------------|-------|--------------------------------------------------------------------------------------------------------------------------------------------------------|
| Percent vitamin A deficient | 0.0%  | Instituto de Nutrición de Centro América y Panamá (INCAP). Sistema de Vigilancia Epidemiológica de Salud y Nutrición (SIVESNU). Guatemala: INCAP; 2016 |
| Percent zinc deficient      | 13.3% | SIVESNU 2016                                                                                                                                           |

Status at birth (percent of total births)

| Input                                          | Value  | Source                                                                                                                                                                                                                                                                                                                                                                         |
|------------------------------------------------|--------|--------------------------------------------------------------------------------------------------------------------------------------------------------------------------------------------------------------------------------------------------------------------------------------------------------------------------------------------------------------------------------|
| Preterm: Small for gestational age (PEG)       | 1.61%  | Default data<br><br><a href="#">Lee AC, Katz J, Blencowe H, et al. National and regional estimates of term and preterm babies born small for gestational age in 138 low-income and middle-income countries in 2010. <i>Lancet Global Health</i> 2013; 1(1): e26-36. <a href="http://www.ncbi.nlm.nih.gov/pubmed/25103583">http://www.ncbi.nlm.nih.gov/pubmed/25103583</a>.</a> |
| Preterm: Appropriate for gestational age (AEG) | 6.10%  |                                                                                                                                                                                                                                                                                                                                                                                |
| Term: Small for gestational age (PEG)          | 11.96% |                                                                                                                                                                                                                                                                                                                                                                                |
| Term: Appropriate for gestational age (AEG)    | 80.33% |                                                                                                                                                                                                                                                                                                                                                                                |
| Total                                          | 100%   |                                                                                                                                                                                                                                                                                                                                                                                |

Incidence (Number of cases per child per year)

|                               | < 1 month | 1-5 months | 6-11 months | 12-23 months | 24-59 months | Source                                                                                                                                                                                                                                                                               |
|-------------------------------|-----------|------------|-------------|--------------|--------------|--------------------------------------------------------------------------------------------------------------------------------------------------------------------------------------------------------------------------------------------------------------------------------------|
| Incidence of diarrhea         | 3.4       | 3.2        | 3.2         | 3.2          | 3.2          | Default data<br><br><a href="#">Fischer Walker CL, Rudan I, Liu L, et al. Global burden of childhood pneumonia and diarrhoea. <i>The Lancet</i> 2013; 381(9875): 1405-16. <a href="http://www.ncbi.nlm.nih.gov/pubmed/23582727">http://www.ncbi.nlm.nih.gov/pubmed/23582727</a>.</a> |
| Incidence of severe diarrhea  | 0.062     | 0.062      | 0.062       | 0.062        | 0.062        |                                                                                                                                                                                                                                                                                      |
| Incidence of severe pneumonia | 0.027     | 0.027      | 0.027       | 0.027        | 0.027        | Default data<br><br><a href="#">Rudan I, O'Brien KL, Nair H, et al. <i>Epidemiology and etiology of childhood</i></a>                                                                                                                                                                |

|                                |       |       |       |       |       |                                                                                                                                                                                                                                                                                                                                                                                                                                                                                                                                                                                                                                                                                                                                                                                                                                                                                                                                                                                                                                                                                                    |
|--------------------------------|-------|-------|-------|-------|-------|----------------------------------------------------------------------------------------------------------------------------------------------------------------------------------------------------------------------------------------------------------------------------------------------------------------------------------------------------------------------------------------------------------------------------------------------------------------------------------------------------------------------------------------------------------------------------------------------------------------------------------------------------------------------------------------------------------------------------------------------------------------------------------------------------------------------------------------------------------------------------------------------------------------------------------------------------------------------------------------------------------------------------------------------------------------------------------------------------|
|                                |       |       |       |       |       | <p><a href="#">pneumonia in 2010: Estimates of incidence, severe morbidity, mortality, underlying risk factors and causative pathogens for 192 countries. Journal of Global Health 2013; 3(1).</a><br/> <a href="http://www.ncbi.nlm.nih.gov/pubmed/23826505">http://www.ncbi.nlm.nih.gov/pubmed/23826505</a>. (Online supplementary material.)</p>                                                                                                                                                                                                                                                                                                                                                                                                                                                                                                                                                                                                                                                                                                                                                |
| <b>Incidence of meningitis</b> | 0.001 | 0.001 | 0.001 | 0.001 | 0.001 | <p>Default data</p> <p>Calculated from the following sources:</p> <p>Davis S, Feikin D, Johnson HL. The effect of Haemophilus influenzae type B and pneumococcal conjugate vaccines on childhood meningitis mortality: A systematic review. BMC Public Health 2013; 13(Suppl 3): S21.<br/> <a href="http://www.ncbi.nlm.nih.gov/pubmed/24564188">http://www.ncbi.nlm.nih.gov/pubmed/24564188</a>.</p> <p>See also the WHO online companion table referenced in the following articles: Watt JP, Wolfson LJ, O'Brien KL, et al. Burden of disease caused by Haemophilus influenzae type b in children younger than 5 years: Global estimates. Lancet 2009; 374(9693): 903-911.<br/> <a href="http://www.ncbi.nlm.nih.gov/pubmed/19748399">http://www.ncbi.nlm.nih.gov/pubmed/19748399</a>.</p> <p>O'Brien KL, Wolfson LJ, Watt JP, et al. Burden of disease caused by Streptococcus pneumoniae in children younger than 5 years: Global estimates. Lancet 2009; 374(9693): 893-902.<br/> <a href="http://www.ncbi.nlm.nih.gov/pubmed/19748398">http://www.ncbi.nlm.nih.gov/pubmed/19748398</a>.</p> |

*Nutrition status distributions*

Stunting

|                 | <b>Percent</b> | <b>Source</b>                                        |
|-----------------|----------------|------------------------------------------------------|
| <b>Stunting</b> | 46.47%         | Automatically calculated from stunting distribution. |

| <b>Stunting distribution</b>                                     | <b>&lt;1 month</b> | <b>1-5 months</b> | <b>6-11 months</b> | <b>12-23 months</b> | <b>24-59 months</b> | <b>Source</b>                                               |
|------------------------------------------------------------------|--------------------|-------------------|--------------------|---------------------|---------------------|-------------------------------------------------------------|
| <b>Greater than 1 SD less than the median norm</b>               | 36.03%             | 36.03%            | 31.34%             | 19.07%              | 19.84%              | Calculated by authors using microdata from ENSMI 2014-2015. |
| <b>Between 1 and 2 SDs less than the median norm</b>             | 34.01%             | 34.01%            | 34.24%             | 30.16%              | 30.37%              |                                                             |
| <b>Between 2 and 3 SDs less than the median norm</b>             | 22.49%             | 22.49%            | 23.94%             | 29.07%              | 31.94%              |                                                             |
| <b>More than 3 standard deviations less than the median norm</b> | 7.466%             | 7.466%            | 10.49%             | 21.7%               | 17.85%              |                                                             |
| <b>Total</b>                                                     | 100.00%            | 100.00%           | 100.01%            | 100.00%             | 100.00%             |                                                             |

### *Pathogens*

#### Diarrhea – distribution among all cases

|                            | <b>1-5 months</b> | <b>6-11 months</b> | <b>12-23 months</b> | <b>24-59 months</b> |
|----------------------------|-------------------|--------------------|---------------------|---------------------|
| <b>Rotavirus</b>           | 5.5%              | 5.5%               | 5.5%                | 5.5%                |
| <b>Pathogen B</b>          | 0%                | 0%                 | 0%                  | 0%                  |
| <b>Pathogen C</b>          | 0%                | 0%                 | 0%                  | 0%                  |
| <b>All other pathogens</b> | 94.5%             | 94.5%              | 94.5%               | 94.5%               |
| <b>Total</b>               | 100%              | 100%               | 100%                | 100%                |

#### Diarrhea – distribution among severe cases

|                            | <b>1-5 months</b> | <b>6-11 months</b> | <b>12-23 months</b> | <b>24-59 months</b> |
|----------------------------|-------------------|--------------------|---------------------|---------------------|
| <b>Rotavirus</b>           | 0%                | 0%                 | 0%                  | 0%                  |
| <b>Pathogen B</b>          | 23.4%             | 23.4%              | 23.4%               | 23.4%               |
| <b>Pathogen C</b>          | 0%                | 0%                 | 0%                  | 0%                  |
| <b>All other pathogens</b> | 76.6%             | 76.6%              | 76.6%               | 76.6%               |
| <b>Total</b>               | 100%              | 100%               | 100%                | 100%                |

#### Diarrhea – distribution among fatal cases

|                            | <b>1-5 months</b> | <b>6-11 months</b> | <b>12-23 months</b> | <b>24-59 months</b> |
|----------------------------|-------------------|--------------------|---------------------|---------------------|
| <b>Rotavirus</b>           | 23.4%             | 23.4%              | 23.4%               | 23.4%               |
| <b>Pathogen B</b>          | 0%                | 0%                 | 0%                  | 0%                  |
| <b>Pathogen C</b>          | 0%                | 0%                 | 0%                  | 0%                  |
| <b>All other pathogens</b> | 76.6%             | 76.6%              | 76.6%               | 76.6%               |
| <b>Total</b>               | 100%              | 100%               | 100%                | 100%                |

Source: Default data, [Fischer Walker CL, Rudan I, Liu L, et al. Global burden of childhood pneumonia and diarrhoea. \*The Lancet\* 2013; 381\(9875\): 1405-16. <http://www.ncbi.nlm.nih.gov/pubmed/23582727>](#)

#### Pneumonia – distribution among severe cases

|                             | <b>1-5 months</b> | <b>6-11 months</b> | <b>12-23 months</b> | <b>24-59 months</b> |
|-----------------------------|-------------------|--------------------|---------------------|---------------------|
| <b>H. influenzae type b</b> | 4%                | 4%                 | 4%                  | 4%                  |
| <b>S. pneumoniae</b>        | 7%                | 7%                 | 7%                  | 7%                  |
| <b>Influenza virus</b>      | 10.7%             | 10.7%              | 10.7%               | 10.7%               |
| <b>All other pathogens</b>  | 78.3%             | 78.3%              | 78.3%               | 78.3%               |
| <b>Total</b>                | 100%              | 100%               | 100%                | 100%                |

#### Pneumonia – distribution among fatal cases

|  | <b>1-5 months</b> | <b>6-11 months</b> | <b>12-23 months</b> | <b>24-59 months</b> |
|--|-------------------|--------------------|---------------------|---------------------|
|--|-------------------|--------------------|---------------------|---------------------|

|                             |       |       |       |       |
|-----------------------------|-------|-------|-------|-------|
| <b>H. influenzae type b</b> | 21.3% | 21.3% | 21.3% | 21.3% |
| <b>S. pneumoniae</b>        | 32.8% | 32.8% | 32.8% | 32.8% |
| <b>Influenza virus</b>      | 10.7% | 10.7% | 10.7% | 10.7% |
| <b>All other pathogens</b>  | 35.2% | 35.2% | 35.2% | 35.2% |
| <b>Total</b>                | 100%  | 100%  | 100%  | 100%  |

Source: Default data, [Rudan I, O'Brien KL, Nair H, et al. Epidemiology and etiology of childhood pneumonia in 2010: Estimates of incidence, severe morbidity, mortality, underlying risk factors and causative pathogens for 192 countries. Journal of Global Health 2013; 3\(1\). http://www.ncbi.nlm.nih.gov/pubmed/23826505](http://www.ncbi.nlm.nih.gov/pubmed/23826505). Please refer to the online supplementary document

#### Meningitis – distribution among severe cases

|                             | <b>1-5 months</b> | <b>6-11 months</b> | <b>12-23 months</b> | <b>24-59 months</b> |
|-----------------------------|-------------------|--------------------|---------------------|---------------------|
| <b>H. influenzae type b</b> | 46%               | 46%                | 46%                 | 46%                 |
| <b>S. pneumoniae</b>        | 52%               | 52%                | 52%                 | 52%                 |
| <b>N. meningitis type A</b> | 2%                | 2%                 | 2%                  | 2%                  |
| <b>All other pathogens</b>  | 0%                | 0%                 | 0%                  | 0%                  |
| <b>Total</b>                | 100%              | 100%               | 100%                | 100%                |

#### Meningitis – distribution among fatal cases

|                             | <b>1-5 months</b> | <b>6-11 months</b> | <b>12-23 months</b> | <b>24-59 months</b> |
|-----------------------------|-------------------|--------------------|---------------------|---------------------|
| <b>H. influenzae type b</b> | 46%               | 46%                | 46%                 | 46%                 |
| <b>S. pneumoniae</b>        | 52%               | 52%                | 52%                 | 52%                 |
| <b>N. meningitis type A</b> | 2%                | 2%                 | 2%                  | 2%                  |
| <b>All other pathogens</b>  | 0%                | 0%                 | 0%                  | 0%                  |
| <b>Total</b>                | 100%              | 100%               | 100%                | 100%                |

Source: Default data, [Davis S, Feikin D, Johnson HL. The effect of Haemophilus influenzae type B and pneumococcal conjugate vaccines on childhood meningitis mortality: A systematic review. BMC Public Health 2013; 13\(Suppl 3\): S21. http://www.ncbi.nlm.nih.gov/pmc/articles/PMC3847464/](http://www.ncbi.nlm.nih.gov/pmc/articles/PMC3847464/)

Supplement to: Tschida S, Cordon A, Asturias G, et al. Projecting the impact of nutrition policy to improve child stunting: a case study in Guatemala using the Lives Saved Tool. *Glob Health Sci Pract.* 2021;9(4).

<https://doi.org/10.9745/GHSP-D-20-00585>

### Baseline child mortality

#### Mortality rate

|                 | <b>Mortality rate</b> |
|-----------------|-----------------------|
| <b>Neonatal</b> | 11.58                 |
| <b>Infant</b>   | 20.56                 |
| <b>Child</b>    | 24.19                 |

Source: Calculated by authors using historical data from: UN Inter-agency Group for Child Mortality Estimation. CME info - Child Mortality Estimates. <http://childmortality.org>.

#### Percent of child deaths by proximate cause

| <b>Neonatal</b>             | <b>Percent</b> | <b>Post neonatal</b> | <b>Percent</b> |
|-----------------------------|----------------|----------------------|----------------|
| <b>Diarrhea</b>             | 0.4%           | <b>Diarrhea</b>      | 13.1%          |
| <b>Sepsis</b>               | 16.8%          | <b>Pneumonia</b>     | 23.5%          |
| <b>Pneumonia</b>            | 5.9%           | <b>Meningitis</b>    | 1.9%           |
| <b>Asphyxia</b>             | 25.0%          | <b>Measles</b>       | 0.0%           |
| <b>Prematurity</b>          | 27.2%          | <b>Malaria</b>       | 0.0%           |
| <b>Tetanus</b>              | 0.0%           | <b>Pertussis</b>     | 1.0%           |
| <b>Congenital anomalies</b> | 16.5%          | <b>AIDS</b>          | 1.2%           |
| <b>Other</b>                | 8.3%           | <b>Injury</b>        | 16.7%          |
| <b>Total</b>                | 100.0%         | <b>Other</b>         | 42.6%          |
|                             |                | <b>Total</b>         | 100.0%         |

Source: Default data, WHO estimates for years 2000-2017.

[https://www.who.int/healthinfo/global\\_burden\\_disease/estimates/en/index2.html](https://www.who.int/healthinfo/global_burden_disease/estimates/en/index2.html)

Liu L, Oza S, Hogan D, et al. Global, regional, and national causes of under-5 mortality in 2000-15: an updated systematic analysis with implications for the Sustainable Development Goals. *Lancet* 2016.

<https://www.ncbi.nlm.nih.gov/pubmed/27839855>



Supplement to: Tschida S, Cordon A, Asturias G, et al. Projecting the impact of nutrition policy to improve child stunting: a case study in Guatemala using the Lives Saved Tool. *Glob Health Sci Pract.* 2021;9(4). <https://doi.org/10.9745/GHSP-D-20-00585>

*Household status*

Poverty/food security

|                                                           | 2020  | 2021  | 2022  | 2023  | 2024  | 2025  | 2026  | 2027  | 2028  | 2029  | 2030  |
|-----------------------------------------------------------|-------|-------|-------|-------|-------|-------|-------|-------|-------|-------|-------|
| <b>Percentage of the population that is food insecure</b> | 22.6% | 22.6% | 22.6% | 22.6% | 22.6% | 22.6% | 22.6% | 22.6% | 22.6% | 22.6% | 22.6% |

Source: SIVESNU 2015

## **Intervention Coverages**

### *Notes*

- Abbreviations
  - HT = Historical trends
  - GC = Great Crusade
- Coverage levels in the Great Crusade model remain static after 2024.
- The Great Crusade fertility and aspirational model are not included in the tables for clarity.
  - The Great Crusade fertility model has the same coverages as the Great Crusade model.
  - Coverage levels in the Aspirational model reach 90.0% in 2024 and remain static till 2030.
- Coverages are linearly interpolated.

*Pregnancy*

Nutritional

| <b>Input</b>                                               | <b>Baseline (2020)</b> | <b>HT (2024)</b> | <b>HT (2030)</b> | <b>GC (2024)</b> | <b>Source</b> |
|------------------------------------------------------------|------------------------|------------------|------------------|------------------|---------------|
| <b>Calcium supplementation in pregnancy</b>                | No data                |                  |                  |                  |               |
| <b>Multiple micronutrient supplementation in pregnancy</b> | 82.3%                  | 82.3%            | 82.3%            | 90.0%            | SIVESNU 2018  |

## Breastfeeding

### Breastfeeding Prevalence

| Input                                           | Baseline (2020) | HT (2024) | HT (2030) | GC (2024) | Source                                                             |
|-------------------------------------------------|-----------------|-----------|-----------|-----------|--------------------------------------------------------------------|
| Prevalence of early initiation of breastfeeding | 66.2%           | 68.6%     | 72.0%     | 71.2%     | Projected value calculated by authors using historical ENSMI data. |

|             | <1 month (2020) | HT (2024) | HT (2030) | GC (2024) |
|-------------|-----------------|-----------|-----------|-----------|
| Exclusive   | 63.7%           | 65.1%     | 68.4%     | 67.7%     |
| Predominant | 13.5%           | 12.9%     | 11.5%     | 12.3%     |
| Partial     | 19.1%           | 18.5%     | 17.1%     | 17.4%     |
| None        | 3.7%            | 3.5%      | 3.0%      | 2.6%      |
| Total       | 100.0%          | 100.0%    | 100.0%    | 100.0%    |

|             | 1-5 months (2020) | HT (2024) | HT (2030) | GC (2024) |
|-------------|-------------------|-----------|-----------|-----------|
| Exclusive   | 52%               | 53.9%     | 56.7%     | 56.0%     |
| Predominant | 16.9%             | 14.7%     | 14.7%     | 15.0%     |
| Partial     | 25.8%             | 23.5%     | 23.5%     | 23.9%     |
| None        | 5.3%              | 5.1%      | 5.1%      | 5.1%      |
| Total       | 100.0%            | 100.0%    | 100.0%    | 100.0%    |

|          | 6-11 months (2020) | HT (2024) | HT (2030) | GC (2024) |
|----------|--------------------|-----------|-----------|-----------|
| Any type | 90.0%              | 90.0%     | 90.0%     | 90.0%     |
| None     | 10.0%              | 10.0%     | 10.0%     | 10.0%     |
| Total    | 100.0%             | 100.0%    | 100.0%    | 100.0%    |

|          | 12-23 months (2020) | HT (2024) | HT (2030) | GC (2024) |
|----------|---------------------|-----------|-----------|-----------|
| Any type | 71.3%               | 71.6%     | 72.1%     | 71.6%     |
| None     | 28.7%               | 28.4%     | 27.9%     | 28.4%     |
| Total    | 100.0%              | 100.0%    | 100.0%    | 100.0%    |

Source: Projected value calculated by authors using historical ENSMI data.

*Preventative*

Food and supplementation

| Input                                          | Baseline (2020) | HT (2024) | HT (2030) | GC (2024) | Source                                                                                                                                                                                                     |
|------------------------------------------------|-----------------|-----------|-----------|-----------|------------------------------------------------------------------------------------------------------------------------------------------------------------------------------------------------------------|
| <b>Comp. feeding (only education)</b>          | 62.6%           | 62.6%     | 62.6%     | 72.6%     | ENSMI 2014-2015                                                                                                                                                                                            |
| <b>Comp. feeding (feeding &amp; education)</b> | 62.6%           | 62.6%     | 62.2%     | 72.6%     | ENSMI 2014-2015                                                                                                                                                                                            |
| <b>Vitamin A supplementation for children</b>  | 26.0%           | 26.0%     | 26.0%     | 51.0%     | Vitamin A Deficiency in Children - UNICEF Data. <a href="https://data.unicef.org/topic/nutrition/vitamin-a-deficiency/">https://data.unicef.org/topic/nutrition/vitamin-a-deficiency/</a> . Published 2019 |
| <b>Zinc supplementation for children</b>       | 86.1%           | 86.1%     | 86.1%     | 90.0%     | SIVESNU 2018                                                                                                                                                                                               |

WASH (water, sanitation and hygiene)

| Input                                              | Baseline (2020) | HT (2024) | HT (2030) | GC (2024) | Source                                                                                                                                                                                                                                                                    |
|----------------------------------------------------|-----------------|-----------|-----------|-----------|---------------------------------------------------------------------------------------------------------------------------------------------------------------------------------------------------------------------------------------------------------------------------|
| <b>Basic sanitation</b>                            | 65.4%           | 65.7%     | 66.2%     | 90.0%     | Projected value calculated by authors using historical data from:<br><br>WHO/UNICEF Joint Monitoring Program (JMP) for Water Supply and Sanitation ( <a href="https://washdata.org/">https://washdata.org/</a> ). Data are available for all countries from 1996 to 2015. |
| <b>Point-of-use water filter or piped in water</b> | 89.2%           | 91.4%     | 93.9%     | 91.4%     |                                                                                                                                                                                                                                                                           |
| <b>Handwashing with soap</b>                       | 76.9%           | 77.1%     | 77.4%     | 90.0%     |                                                                                                                                                                                                                                                                           |

Supplement to: Tschida S, Cordon A, Asturias G, et al. Projecting the impact of nutrition policy to improve child stunting: a case study in Guatemala using the Lives Saved Tool. *Glob Health Sci Pract.* 2021;9(4).

<https://doi.org/10.9745/GHSP-D-20-00585>

### *Vaccines*

| <b>Input</b>               | <b>Baseline (2020)</b> | <b>HT (2024)</b> | <b>HT (2030)</b> | <b>GC (2024)</b> | <b>Source</b>                                                           |
|----------------------------|------------------------|------------------|------------------|------------------|-------------------------------------------------------------------------|
| <b>Rotavirus (2 doses)</b> | 88.4%                  | 90.0%            | 90.0%            | 90.0%            | Projected value calculated by authors using historical data from ENSMI. |

Supplement to: Tschida S, Cordon A, Asturias G, et al. Projecting the impact of nutrition policy to improve child stunting: a case study in Guatemala using the Lives Saved Tool. *Glob Health Sci Pract.* 2021;9(4). <https://doi.org/10.9745/GHSP-D-20-00585>

*Curative*

| <b>Input</b>                      | <b>Baseline (2020)</b> | <b>Source</b> |
|-----------------------------------|------------------------|---------------|
| <b>Kangaroo mother care (KMC)</b> | No data                |               |

### *Fertility Risks*

#### Maternal age

| <b>Less than 18 years old</b>   | <b>2020*</b> | <b>2030*</b> | <b>GC (fertility) 2030</b> |
|---------------------------------|--------------|--------------|----------------------------|
| <b>First birth</b>              | 8.0%         | 7.8%         | 0.0%                       |
| <b>Second and third birth</b>   | 0.9%         | 0.6%         | 0.0%                       |
| <b>Greater than third birth</b> | 0.0%         | 0.0%         | 0.0%                       |
| <b>18 to 34 years old</b>       |              |              |                            |
| <b>First birth</b>              | 26.5%        | 32.1%        | 39.9%                      |
| <b>Second and third birth</b>   | 39.5%        | 39.2%        | 39.8%                      |
| <b>Greater than third birth</b> | 14.5%        | 9.1%         | 9.1%                       |
| <b>35 to 49 years old</b>       |              |              |                            |
| <b>First birth</b>              | 0.5%         | 0.9%         | 0.9%                       |
| <b>Second and third birth</b>   | 3.3%         | 5.9%         | 5.9%                       |
| <b>Greater than third birth</b> | 6.8%         | 4.4%         | 4.4%                       |
| <b>Total</b>                    | 100%         | 100%         | 100.0%                     |

Source: Calculated by authors using microdata from ENSMI 2014-2015.

#### Birth intervals

| <b>Birth intervals</b>     | <b>2020*</b> | <b>2030*</b> | <b>GC (fertility) 2030</b> |
|----------------------------|--------------|--------------|----------------------------|
| <b>First birth</b>         | 35.4%        | 43.3%        | 43.3%                      |
| <b>Less than 18 months</b> | 3.0%         | 2.0%         | 0.0%                       |
| <b>18-23 months</b>        | 6.6%         | 4.3%         | 0.0%                       |
| <b>24 months or more</b>   | 55.0%        | 50.4%        | 56.7%                      |
| <b>Total</b>               | 100.0%       | 100%         | 100%                       |

Source: Calculated by authors using microdata from ENSMI 2014-2015.

\*Note: The historical trends, Great Crusade, and aspirational models have the same fertility risk.



## MODEL OUTPUTS

### Stunting Prevalence

| Stunting Prevalence Median % (95% CI) | 2020                  | 2021                  | 2022                  | 2023                  | 2024                  | 2025                  | 2026                  | 2027                  | 2028                  | 2029                  | 2030                  |
|---------------------------------------|-----------------------|-----------------------|-----------------------|-----------------------|-----------------------|-----------------------|-----------------------|-----------------------|-----------------------|-----------------------|-----------------------|
| <b>Historical Trends</b>              | 46.48 (46.48 - 46.48) | 46.51 (46.49 - 46.52) | 46.51 (46.46 - 46.55) | 46.38 (46.3 - 46.43)  | 46.39 (46.26 - 46.47) | 46.25 (46.08 - 46.36) | 46.29 (46.08 - 46.43) | 46.19 (45.94 - 46.36) | 46.11 (45.81 - 46.3)  | 46.18 (45.84 - 46.4)  | 46.09 (45.71 - 46.33) |
| <b>Great Crusade</b>                  | 46.48 (46.48 - 46.48) | 46.37 (46.3 - 46.42)  | 46.16 (45.99 - 46.27) | 45.75 (45.46 - 45.93) | 45.41 (44.98 - 45.68) | 45.03 (44.5 - 45.37)  | 44.91 (44.3 - 45.3)   | 44.72 (44.06 - 45.15) | 44.62 (43.93 - 45.07) | 44.71 (43.99 - 45.17) | 44.63 (43.89 - 45.11) |
| <b>Great Crusade (fertility)</b>      | 46.48 (46.48 - 46.48) | 46.37 (46.29 - 46.42) | 46.16 (45.96 - 46.28) | 45.74 (45.4 - 45.95)  | 45.39 (44.88 - 45.71) | 45.01 (44.37 - 45.41) | 44.87 (44.13 - 45.34) | 44.68 (43.86 - 45.2)  | 44.58 (43.69 - 45.13) | 44.66 (43.71 - 45.24) | 44.57 (43.57 - 45.18) |
| <b>Aspirational</b>                   | 46.48 (46.48 - 46.48) | 46.25 (46.12 - 46.33) | 45.81 (45.49 - 46.02) | 45.06 (44.51 - 45.44) | 44.28 (43.45 - 44.85) | 43.56 (42.52 - 44.28) | 43.19 (42.01 - 44.02) | 42.88 (41.61 - 43.78) | 42.75 (41.44 - 43.68) | 42.83 (41.5 - 43.77)  | 42.76 (41.41 - 43.71) |

## Stunting Cases Averted

| Stunting Cases Averted           | 2020      | 2021                  | 2022                    | 2023                     | 2024                     | 2025                     | 2026                     | 2027                     | 2028                     | 2029                     | 2030                     |
|----------------------------------|-----------|-----------------------|-------------------------|--------------------------|--------------------------|--------------------------|--------------------------|--------------------------|--------------------------|--------------------------|--------------------------|
| <b>Historical Trends</b>         | 0 (0 - 0) | 328 (126 - 680)       | 757 (228 - 1,590)       | 1,381 (457 - 2,803)      | 1,997 (646 - 4,196)      | 2,640 (766 - 5,659)      | 3,307 (924 - 7,087)      | 3,912 (1,038 - 8,418)    | 4,479 (1,148 - 9,662)    | 5,010 (1,272 - 10,836)   | 5,496 (1,362 - 11,934)   |
| <b>Great Crusade</b>             | 0 (0 - 0) | 2,938 (2,042 - 4,290) | 7,254 (5,128 - 10,384)  | 12,878 (9,246 - 18,153)  | 19,684 (14,292 - 27,303) | 24,308 (17,683 - 33,587) | 27,584 (20,082 - 38,095) | 29,551 (21,413 - 40,947) | 30,178 (2,1691 - 42,078) | 30,345 (21,663 - 42,546) | 30,313 (21,466 - 42,772) |
| <b>Great Crusade (fertility)</b> | 0 (0 - 0) | 2,973 (2,000 - 4,462) | 7,324 (5,022 - 10,767)  | 13,027 (9,041 - 18,820)  | 19,884 (13,987 - 28,356) | 24,637 (17,254 - 35,116) | 28,038 (19,538 - 40,140) | 30,098 (20,724 - 43,549) | 30,853 (20,838 - 45,302) | 31,120 (20,648 - 46,349) | 31,213 (20,277 - 47,222) |
| <b>Aspirational</b>              | 0 (0 - 0) | 5,254 (3,572 - 7,631) | 13,760 (9,598 - 19,489) | 25,324 (17,975 - 35,240) | 39,632 (28,567 - 54,259) | 49,992 (36,174 - 68,041) | 57,128 (41,473 - 77,443) | 61,107 (44,284 - 82,853) | 62,067 (44,754 - 84,412) | 62,069 (44,665 - 84,557) | 61,625 (44,172 - 84,193) |

## Stunting Cases Averted by Intervention

### *Historical Trends*

| Stunting Cases Averted               | 2020      | 2021            | 2022              | 2023                | 2024                | 2025                | 2026                  | 2027                  | 2028                  | 2029                  | 2030                  |
|--------------------------------------|-----------|-----------------|-------------------|---------------------|---------------------|---------------------|-----------------------|-----------------------|-----------------------|-----------------------|-----------------------|
| <b>Birth intervals</b>               | 0 (0 - 0) | 0 (0 - 62)      | 9 (0 - 161)       | 17 (0 - 281)        | 30 (0 - 466)        | 44 (0 - 761)        | 54 (0 - 939)          | 66 (0 - 1,140)        | 80 (0 - 1,261)        | 91 (0 - 1,432)        | 101 (0 - 1,609)       |
| <b>Breastfeeding</b>                 | 0 (0 - 0) | 16 (3 - 52)     | 42 (2 - 128)      | 95 (8 - 254)        | 144 (10 - 386)      | 217 (14 - 563)      | 266 (16 - 696)        | 332 (19 - 867)        | 407 (26 - 1,059)      | 440 (24 - 1,154)      | 499 (27 - 1,304)      |
| <b>Filtered water/piped in water</b> | 0 (0 - 0) | 312 (155 - 563) | 677 (275 - 1,240) | 1,218 (500 - 2,167) | 1,728 (703 - 3,157) | 2,253 (858 - 4,091) | 2,812 (1,024 - 5,112) | 3,310 (1,164 - 6,012) | 3,761 (1,284 - 6,886) | 4,200 (1,423 - 7,697) | 4,594 (1,547 - 8,422) |
| <b>Basic sanitation</b>              | 0 (0 - 0) | 0 (0 - 0)       | 15 (5 - 28)       | 35 (13 - 65)        | 58 (21 - 109)       | 86 (29 - 160)       | 113 (36 - 210)        | 141 (44 - 262)        | 144 (44 - 269)        | 170 (51 - 319)        | 194 (58 - 365)        |
| <b>Hand washing with soap</b>        | 0 (0 - 0) | 0 (0 - 0)       | 14 (5 - 29)       | 16 (6 - 33)         | 36 (13 - 74)        | 40 (14 - 82)        | 63 (21 - 128)         | 65 (21 - 134)         | 89 (27 - 183)         | 113 (34 - 232)        | 113 (34 - 232)        |
| <b>Rotavirus vaccine</b>             | 0 (0 - 0) | 3 (2 - 3)       | 3 (2 - 3)         | 3 (2 - 3)           | 2 (2 - 3)           | 2 (2 - 3)           | 2 (1 - 3)             | 2 (1 - 3)             | 2 (1 - 3)             | 2 (1 - 3)             | 2 (1 - 3)             |

Great Crusade

| Stunting Cases Averted                                                  | 2020      | 2021              | 2022                  | 2023                  | 2024                  | 2025                   | 2026                     | 2027                     | 2028                     | 2029                     | 2030                     |
|-------------------------------------------------------------------------|-----------|-------------------|-----------------------|-----------------------|-----------------------|------------------------|--------------------------|--------------------------|--------------------------|--------------------------|--------------------------|
| <b>Micronutrient supplementation (iron and multiple micronutrients)</b> | 0 (0 - 0) | 17 (8 - 30)       | 48 (26 - 83)          | 89 (49 - 152)         | 138 (78 - 232)        | 178 (102 - 293)        | 194 (111 - 319)          | 203 (116 - 336)          | 204 (116 - 340)          | 200 (113 - 333)          | 197 (109 - 329)          |
| <b>Birth intervals</b>                                                  | 0 (0 - 0) | 6 (0 - 69)        | 14 (0 - 176)          | 23 (0 - 306)          | 39 (0 - 496)          | 63 (0 - 901)           | 80 (0 - 1,143)           | 96 (0 - 1,375)           | 113 (0 - 1,471)          | 124 (0 - 1,624)          | 134 (0 - 1,786)          |
| <b>Breastfeeding</b>                                                    | 0 (0 - 0) | 45 (4 - 104)      | 121 (7 - 279)         | 223 (14 - 505)        | 363 (36 - 789)        | 467 (45 - 997)         | 512 (51 - 1,089)         | 538 (54 - 1,144)         | 540 (54 - 1,155)         | 530 (53 - 1,132)         | 520 (51 - 1,114)         |
| <b>Complementary feeding</b>                                            | 0 (0 - 0) | 758 (737 - 766)   | 2,199 (2,147 - 2,222) | 4,340 (4,241 - 4,389) | 7,172 (6,997 - 7,266) | 9,214 (9,011 - 9,313)  | 10,640 (10,380 - 10,757) | 11,389 (11,061 - 11,527) | 11,532 (11,113 - 11,698) | 11,455 (10,981 - 11,625) | 11,265 (10,745 - 11,441) |
| <b>Zinc supplementation</b>                                             | 0 (0 - 0) | 438 (411 - 478)   | 924 (865 - 1,004)     | 1,482 (1,376 - 1,602) | 2,105 (1,948 - 2,278) | 2,257 (2,084 - 2,451)  | 2,423 (2,228 - 2,632)    | 2,509 (2,298 - 2,728)    | 2,503 (2,277 - 2,725)    | 2,488 (2,253 - 2,714)    | 2,454 (2,213 - 2,677)    |
| <b>Filtered water/piped in water</b>                                    | 0 (0 - 0) | 350 (201 - 567)   | 764 (445 - 1,230)     | 1,334 (781 - 2,132)   | 1,905 (1,121 - 3,028) | 2,668 (1,569 - 4,204)  | 3,452 (2,030 - 5,436)    | 4,069 (2,385 - 6,405)    | 4,536 (2,644 - 7,166)    | 4,938 (2,866 - 7,799)    | 5,308 (3,064 - 8,387)    |
| <b>Basic sanitation</b>                                                 | 0 (0 - 0) | 885 (449 - 1,467) | 2,116 (1,093 - 3,476) | 3,590 (1,870 - 5,861) | 5,291 (2,773 - 8,598) | 6,281 (3,300 - 10,102) | 6,822 (3,584 - 10,960)   | 7,124 (3,730 - 11,438)   | 7,128 (3,712 - 11,485)   | 7,036 (3,648 - 11,340)   | 6,920 (3,567 - 11,156)   |
| <b>Hand washing with soap</b>                                           | 0 (0 - 0) | 437 (229 - 805)   | 1,044 (551 - 1,898)   | 1,772 (937 - 3,193)   | 2,611 (1,385 - 4,676) | 3,097 (1,639 - 5,484)  | 3,364 (1,778 - 5,952)    | 3,513 (1,850 - 6,212)    | 3,515 (1,840 - 6,237)    | 3,470 (1,809 - 6,159)    | 3,412 (1,769 - 6,059)    |
| <b>Rotavirus vaccine</b>                                                | 0 (0 - 0) | 3 (2 - 3)         | 3 (2 - 3)             | 2 (2 - 3)             | 2 (2 - 3)             | 2 (2 - 3)              | 2 (2 - 3)                | 2 (2 - 3)                | 2 (2 - 3)                | 2 (2 - 2)                | 2 (2 - 2)                |

*Great Crusade (fertility)*

| Stunting Cases Averted                                                  | 2020      | 2021              | 2022                  | 2023                  | 2024                  | 2025                  | 2026                     | 2027                     | 2028                     | 2029                     | 2030                     |
|-------------------------------------------------------------------------|-----------|-------------------|-----------------------|-----------------------|-----------------------|-----------------------|--------------------------|--------------------------|--------------------------|--------------------------|--------------------------|
| <b>Micronutrient supplementation (iron and multiple micronutrients)</b> | 0 (0 - 0) | 9 (3 - 15)        | 25 (11 - 42)          | 46 (22 - 76)          | 71 (36 - 116)         | 91 (47 - 145)         | 99 (51 - 157)            | 104 (53 - 165)           | 105 (52 - 166)           | 103 (51 - 163)           | 101 (49 - 161)           |
| <b>Maternal age and birth order</b>                                     | 0 (0 - 0) | 14 (8 - 15)       | 41 (28 - 42)          | 75 (56 - 76)          | 118 (92 - 119)        | 183 (150 - 186)       | 247 (204 - 254)          | 300 (244 - 309)          | 344 (273 - 356)          | 375 (296 - 388)          | 409 (319 - 425)          |
| <b>Birth intervals</b>                                                  | 0 (0 - 0) | 17 (0 - 235)      | 48 (0 - 650)          | 88 (0 - 1191)         | 138 (0 - 1835)        | 224 (0 - 2906)        | 298 (0 - 3821)           | 369 (0 - 4722)           | 431 (0 - 5512)           | 482 (0 - 6173)           | 536 (0 - 6867)           |
| <b>Breastfeeding</b>                                                    | 0 (0 - 0) | 46 (4 - 105)      | 123 (7 - 277)         | 226 (14 - 500)        | 366 (34 - 778)        | 470 (43 - 974)        | 516 (48 - 1,060)         | 542 (50 - 1,110)         | 546 (49 - 1,118)         | 536 (48 - 1,099)         | 527 (47 - 1,084)         |
| <b>Complementary feeding</b>                                            | 0 (0 - 0) | 761 (725 - 767)   | 2,196 (2,096 - 2,220) | 4,337 (4,134 - 4,380) | 7,169 (6,820 - 7,251) | 9,170 (8,739 - 9,291) | 10,571 (10,013 - 10,719) | 11,302 (10,620 - 11,477) | 11,441 (10,609 - 11,615) | 11,377 (10,411 - 11,558) | 11,211 (10,108 - 11,379) |
| <b>Zinc supplementation</b>                                             | 0 (0 - 0) | 438 (411 - 478)   | 924 (863 - 1,001)     | 1,482 (1,364 - 1,598) | 2,107 (1,919 - 2,281) | 2,260 (2,042 - 2,453) | 2,425 (2,176 - 2,627)    | 2,514 (2,237 - 2,716)    | 2,510 (2,208 - 2,712)    | 2,498 (2,172 - 2,699)    | 2,466 (2,121 - 2,666)    |
| <b>Filtered water/piped in water</b>                                    | 0 (0 - 0) | 352 (195 - 568)   | 767 (431 - 1,221)     | 1,340 (754 - 2,107)   | 1,911 (1,083 - 2,985) | 2,678 (1,510 - 4,120) | 3,467 (1,946 - 5,305)    | 4,084 (2,268 - 6,235)    | 4,558 (2,490 - 6,961)    | 4,965 (2,685 - 7,588)    | 5,345 (2,853 - 8,178)    |
| <b>Basic sanitation</b>                                                 | 0 (0 - 0) | 891 (433 - 1,470) | 2,124 (1,055 - 3,450) | 3,606 (1,801 - 5,790) | 5,309 (2,674 - 8,470) | 6,301 (3,170 - 9,901) | 6,846 (3,429 - 10,708)   | 7,144 (3,541 - 11,151)   | 7,157 (3,488 - 11,174)   | 7,071 (3,411 - 11,050)   | 6,964 (3,315 - 10,894)   |
| <b>Hand washing with soap</b>                                           | 0 (0 - 0) | 440 (221 - 806)   | 1,049 (533 - 1,884)   | 1,780 (905 - 3,155)   | 2,619 (1,338 - 4,608) | 3,109 (1,577 - 5,373) | 3,378 (1,703 - 5,808)    | 3,525 (1,758 - 6,046)    | 3,531 (1,732 - 6,058)    | 3,489 (1,694 - 5,991)    | 3,436 (1,647 - 5,906)    |
| <b>Rotavirus vaccine</b>                                                | 0 (0 - 0) | 3 (2 - 3)         | 3 (2 - 3)             | 2 (2 - 3)             | 2 (2 - 3)             | 2 (2 - 3)             | 2 (2 - 3)                | 2 (2 - 3)                | 2 (2 - 2)                | 2 (2 - 2)                | 2 (2 - 2)                |

*Aspirational*

| Stunting Cases Averted                                                  | 2020      | 2021                  | 2022                  | 2023                     | 2024                     | 2025                     | 2026                     | 2027                     | 2028                     | 2029                     | 2030                     |
|-------------------------------------------------------------------------|-----------|-----------------------|-----------------------|--------------------------|--------------------------|--------------------------|--------------------------|--------------------------|--------------------------|--------------------------|--------------------------|
| <b>Micronutrient supplementation (iron and multiple micronutrients)</b> | 0 (0 - 0) | 11 (0 - 20)           | 30 (12 - 53)          | 55 (24 - 96)             | 83 (39 - 145)            | 106 (53 - 183)           | 115 (58 - 198)           | 121 (61 - 207)           | 121 (61 - 209)           | 119 (60 - 205)           | 117 (58 - 202)           |
| <b>Birth intervals</b>                                                  | 0 (0 - 0) | 7 (0 - 90)            | 17 (0 - 222)          | 28 (0 - 381)             | 46 (0 - 608)             | 74 (0 - 1,096)           | 94 (0 - 1,384)           | 112 (0 - 1,660)          | 132 (0 - 1,771)          | 145 (0 - 1,953)          | 158 (0 - 2,148)          |
| <b>Breastfeeding</b>                                                    | 0 (0 - 0) | 638 (121 - 1,416)     | 1,650 (281 - 3,602)   | 3,008 (526 - 6,425)      | 4,642 (853 - 9,695)      | 5,820 (1,008 - 12,077)   | 6,550 (1,193 - 13,464)   | 6,936 (1,281 - 14,201)   | 6,979 (1,291 - 14,305)   | 6,887 (1,287 - 14,074)   | 6,766 (1,263 - 13,813)   |
| <b>Complementary feeding</b>                                            | 0 (0 - 0) | 2,337 (2,151 - 2,479) | 6,739 (6,247 - 7,074) | 13,239 (12,278 - 13,912) | 21,819 (20,181 - 22,987) | 28,230 (26,136 - 29,564) | 32,666 (30,148 - 34,167) | 34,976 (32,187 - 36,520) | 35,358 (32,418 - 37,022) | 35,154 (32,187 - 36,812) | 34,611 (31,645 - 36,224) |
| <b>Zinc supplementation</b>                                             | 0 (0 - 0) | 451 (418 - 499)       | 989 (905 - 1,099)     | 1,612 (1,444 - 1,809)    | 2,304 (2,044 - 2,601)    | 2,492 (2,191 - 2,826)    | 2,682 (2,346 - 3,044)    | 2,782 (2,426 - 3,158)    | 2,773 (2,410 - 3,150)    | 2,760 (2,395 - 3,135)    | 2,725 (2,363 - 3,094)    |
| <b>Filtered water/piped in water</b>                                    | 0 (0 - 0) | 378 (202 - 626)       | 841 (458 - 1,382)     | 1,470 (808 - 2,410)      | 2,081 (1,158 - 3,388)    | 2,928 (1,639 - 4,737)    | 3,789 (2,127 - 6,121)    | 4,463 (2,502 - 7,199)    | 4,972 (2,776 - 8,031)    | 5,415 (3,022 - 8,731)    | 5,829 (3,242 - 9,386)    |
| <b>Basic sanitation</b>                                                 | 0 (0 - 0) | 951 (447 - 1,605)     | 2,329 (1,122 - 3,906) | 3,949 (1,926 - 6,605)    | 5,782 (2,861 - 9,607)    | 6,895 (3,445 - 11,382)   | 7,488 (3,754 - 12,351)   | 7,813 (3,912 - 12,873)   | 7,814 (3,897 - 12,889)   | 7,717 (3,845 - 12,711)   | 7,600 (3,774 - 12,501)   |
| <b>Hand washing with soap</b>                                           | 0 (0 - 0) | 477 (231 - 893)       | 1,158 (571 - 2,147)   | 1,949 (967 - 3,598)      | 2,852 (1,430 - 5,225)    | 3,399 (1,711 - 6,174)    | 3,691 (1,862 - 6,696)    | 3,852 (1,940 - 6,977)    | 3,852 (1,932 - 6,984)    | 3,805 (1,906 - 6,888)    | 3,747 (1,872 - 6,775)    |
| <b>Rotavirus vaccine</b>                                                | 0 (0 - 0) | 3 (2 - 3)             | 3 (2 - 3)             | 3 (2 - 3)                | 3 (2 - 3)                | 3 (2 - 3)                | 3 (2 - 3)                | 3 (2 - 3)                | 2 (2 - 3)                | 2 (2 - 3)                | 2 (2 - 3)                |
